# Supplementary material
Source: PubMed Central journal article supplement (PMC6684443)
Supplement: NIHMS1032039-supplement-Supplement.pdf [file NIHMS1032039-supplement-Supplement.pdf]

Supplementary Material for  
**Instrumental Variable Approach to  
Estimating the Scalar-on-Function Regression  
Model with Measurement Error with  
Application to Energy Expenditure  
Assessment in Childhood Obesity**

Carmen D. Tekwe, Roger S. Zoh, Miao Yang, Raymond J. Carroll, Gilson Honvoh, David  
B. Allison, Mark Benden, Lan Xue

The Supplementary Materials are organized as follows. Section S.1 contains additional tables summarizing the effect of the sample size on the performance of the estimators of  $\beta_2(t)$ . Section S.2 presents additional table describing the performance of the estimators  $\hat{\beta}_X$ ,  $\hat{\beta}_W$ ,  $\hat{\beta}_{WS}$ ,  $\hat{\beta}_{WRS}$  with respect to varying measurement error (ME) variance ( $\sigma_u$ ) and instrument variable (IV) variance  $\sigma_\omega$ , assuming the data was generated based on  $\beta_1(t)$ . Finally, Section S.3 shows additional tables illustrating the effect of varying correlation in  $X$  ( $\rho_u$ ), the measurement error ( $\rho_u$ ), and the instrumental variable  $\rho_\omega$ .

## S.1 Sample Size Effect for $\beta_2(t)$

Table S.1: This table assesses the impact of sample sizes on the estimators. The averaged squared bias (ABias<sup>2</sup>), averaged sample variance (Avar) and averaged integrated mean squared error (AIMSE) of  $\hat{\beta}_X$  for different sample sizes  $n$ . The true function is  $\beta_2(t)$

| $\hat{\beta}_X$     |                    |        |        |
|---------------------|--------------------|--------|--------|
| $n$                 | ABias <sup>2</sup> | Avar   | AIMSE  |
| 100                 | 0.0340             | 0.2500 | 0.2840 |
| 200                 | 0.0245             | 0.1360 | 0.1604 |
| 500                 | 0.0115             | 0.0593 | 0.0707 |
| 1000                | 0.0070             | 0.0354 | 0.0423 |
| $\hat{\beta}_W$     |                    |        |        |
| $n$                 | ABias <sup>2</sup> | Avar   | AIMSE  |
| 100                 | 0.0637             | 0.1396 | 0.2032 |
| 200                 | 0.0557             | 0.0745 | 0.1302 |
| 500                 | 0.0416             | 0.0329 | 0.0746 |
| 1000                | 0.0391             | 0.0191 | 0.0582 |
| $\hat{\beta}_{WRS}$ |                    |        |        |
| $n$                 | ABias <sup>2</sup> | Avar   | AIMSE  |
| 100                 | 0.0641             | 0.1392 | 0.2033 |
| 200                 | 0.0561             | 0.0744 | 0.1305 |
| 500                 | 0.0419             | 0.0330 | 0.0749 |
| 1000                | 0.0393             | 0.0191 | 0.0584 |
| $\hat{\beta}_{WS}$  |                    |        |        |
| $n$                 | ABias <sup>2</sup> | Avar   | AIMSE  |
| 100                 | 0.0344             | 0.5301 | 0.5645 |
| 200                 | 0.0334             | 0.2503 | 0.2837 |
| 500                 | 0.0190             | 0.1213 | 0.1403 |
| 1000                | 0.0160             | 0.0746 | 0.0905 |
| $\hat{\beta}_{IV}$  |                    |        |        |
| $n$                 | ABias <sup>2</sup> | Avar   | AIMSE  |
| 100                 | 0.0343             | 0.2709 | 0.3052 |
| 200                 | 0.0251             | 0.1470 | 0.1721 |
| 500                 | 0.0115             | 0.0656 | 0.0771 |
| 1000                | 0.0071             | 0.0386 | 0.0456 |

Table S.2: This table assesses the impact of sample sizes on the estimators. The averaged squared bias (ABias<sup>2</sup>), averaged sample variance (Avar) and averaged integrated mean squared error (AIMSE) of  $\widehat{\beta}_X$  for different sample sizes  $n$ . The response error is assumed to have a *Gamma*(1, 1.5) distribution, where *Gamma*( $\alpha, \beta$ ) denotes a distribution with mean  $\alpha\beta$ . The true function is  $\beta_2(t)$ .

| $\beta_2$ | $\widehat{\beta}_X$     |        |        |
|-----------|-------------------------|--------|--------|
| $n$       | ABias <sup>2</sup>      | Avar   | AIMSE  |
| 100       | 0.0494                  | 0.4825 | 0.5319 |
| 200       | 0.0365                  | 0.2575 | 0.2939 |
| 500       | 0.0171                  | 0.1088 | 0.1260 |
| 1000      | 0.0139                  | 0.0630 | 0.0769 |
| $\beta_2$ | $\widehat{\beta}_W$     |        |        |
| $n$       | ABias <sup>2</sup>      | Avar   | AIMSE  |
| 100       | 0.0733                  | 0.2669 | 0.3402 |
| 200       | 0.0650                  | 0.1414 | 0.2063 |
| 500       | 0.0444                  | 0.0611 | 0.1055 |
| 1000      | 0.0442                  | 0.0349 | 0.0791 |
| $\beta_2$ | $\widehat{\beta}_{WRS}$ |        |        |
| $n$       | ABias <sup>2</sup>      | Avar   | AIMSE  |
| 100       | 0.0735                  | 0.2672 | 0.3407 |
| 200       | 0.0658                  | 0.1404 | 0.2062 |
| 500       | 0.0453                  | 0.0611 | 0.1064 |
| 1000      | 0.0447                  | 0.0348 | 0.0796 |
| $\beta_2$ | $\widehat{\beta}_{WS}$  |        |        |
| $n$       | ABias <sup>2</sup>      | Avar   | AIMSE  |
| 100       | 0.0429                  | 1.0618 | 1.1048 |
| 200       | 0.0388                  | 0.4594 | 0.4981 |
| 500       | 0.0207                  | 0.2309 | 0.2517 |
| 1000      | 0.0202                  | 0.1269 | 0.1471 |
| $\beta_2$ | $\widehat{\beta}_{IV}$  |        |        |
| $n$       | ABias <sup>2</sup>      | Avar   | AIMSE  |
| 100       | 0.0495                  | 0.5044 | 0.5539 |
| 200       | 0.0370                  | 0.2742 | 0.3112 |
| 500       | 0.0171                  | 0.1173 | 0.1344 |
| 1000      | 0.0140                  | 0.0676 | 0.0816 |

## S.2 Error variance effect

Table S.3: Impacts of varying magnitudes of measurement error and instrumental variable variance on our proposed estimator. The averaged squared bias (ABias<sup>2</sup>), averaged sample variance (Avar) and averaged integrated mean squared error (AIMSE) of  $\hat{\beta}_X$  for sample size  $n = 500$ . The true function is  $\beta_1(t)$ .

| $\sigma_\omega = 1$ |                    |        |        | $\sigma_u = 1$  |                    |        |        |
|---------------------|--------------------|--------|--------|-----------------|--------------------|--------|--------|
| $\sigma_u$          | ABias <sup>2</sup> | Avar   | AIMSE  | $\sigma_\omega$ | ABias <sup>2</sup> | Avar   | AIMSE  |
| 0.5                 | 0.0001             | 0.0479 | 0.0480 | 0.50            | 0.0001             | 0.0477 | 0.0478 |
| 1                   | 0.0001             | 0.0474 | 0.0475 | 1.00            | 0.0001             | 0.0474 | 0.0475 |
| 4                   | 0.0001             | 0.0408 | 0.0408 | 4.00            | 0.0001             | 0.0432 | 0.0432 |
| 16                  | 0.0001             | 0.0411 | 0.0412 | 16.00           | 0.0001             | 0.0396 | 0.0397 |

Table S.4: Impacts of varying magnitudes of measurement error and instrumental variable variance on our proposed estimator. The averaged squared bias (ABias<sup>2</sup>), averaged sample variance (Avar) and averaged integrated mean squared error (AIMSE) of  $\hat{\beta}_W$  for sample size  $n = 500$ . The true function is  $\beta_1(t)$ .

| $\sigma_\omega = 1$ |                    |        |        | $\sigma_u = 1$  |                    |        |        |
|---------------------|--------------------|--------|--------|-----------------|--------------------|--------|--------|
| $\sigma_u$          | ABias <sup>2</sup> | Avar   | AIMSE  | $\sigma_\omega$ | ABias <sup>2</sup> | Avar   | AIMSE  |
| 0.5                 | 0.0001             | 0.0475 | 0.0476 | 0.50            | 0.0004             | 0.0458 | 0.0462 |
| 1                   | 0.0004             | 0.0455 | 0.0458 | 1.00            | 0.0004             | 0.0455 | 0.0458 |
| 4                   | 0.0392             | 0.0246 | 0.0638 | 4.00            | 0.0003             | 0.0412 | 0.0415 |
| 16                  | 0.3664             | 0.0036 | 0.3701 | 16.00           | 0.0003             | 0.0376 | 0.0380 |

Table S.5: Impacts of varying magnitudes of measurement error and instrumental variable variance on our proposed estimator. The averaged squared bias (ABias<sup>2</sup>), averaged sample variance (Avar) and averaged integrated mean squared error (AIMSE) of  $\widehat{\beta}_{WSR}$  for sample size  $n = 500$  (WSR). The true function is  $\beta_1(t)$ .

| $\sigma_\omega = 1$ |                    |        |        | $\sigma_u = 1$  |                    |        |        |
|---------------------|--------------------|--------|--------|-----------------|--------------------|--------|--------|
| $\sigma_u$          | ABias <sup>2</sup> | Avar   | AIMSE  | $\sigma_\omega$ | ABias <sup>2</sup> | Avar   | AIMSE  |
| 0.5                 | 0.0001             | 0.0477 | 0.0478 | 0.50            | 0.0004             | 0.0460 | 0.0463 |
| 1                   | 0.0003             | 0.0455 | 0.0459 | 1.00            | 0.0003             | 0.0455 | 0.0459 |
| 4                   | 0.0392             | 0.0247 | 0.0638 | 4.00            | 0.0003             | 0.0413 | 0.0417 |
| 16                  | 0.3664             | 0.0037 | 0.3701 | 16.00           | 0.0003             | 0.0381 | 0.0384 |

Table S.6: Impacts of varying magnitudes of measurement error and instrumental variable variance on our proposed estimator. The averaged squared bias (ABias<sup>2</sup>), averaged sample variance (Avar) and averaged integrated mean squared error (AIMSE) of  $\hat{\beta}_{WS}$  for sample size  $n = 500$ . The true function is  $\beta_1(t)$ .

| $\sigma_\omega = 1$ |                    |        |        | $\sigma_u = 1$  |                    |        |        |
|---------------------|--------------------|--------|--------|-----------------|--------------------|--------|--------|
| $\sigma_u$          | ABias <sup>2</sup> | Avar   | AIMSE  | $\sigma_\omega$ | ABias <sup>2</sup> | Avar   | AIMSE  |
| 0.50                | 0.0148             | 0.1877 | 0.2025 | 0.50            | 0.0113             | 0.1855 | 0.1968 |
| 1                   | 0.0114             | 0.1816 | 0.1929 | 1.00            | 0.0114             | 0.1816 | 0.1929 |
| 4                   | 0.0144             | 0.0867 | 0.1011 | 4.00            | 0.0112             | 0.1484 | 0.1596 |
| 16                  | 0.3512             | 0.0160 | 0.3672 | 16.00           | 0.0112             | 0.1363 | 0.1475 |



Table S.7: Impacts of varying magnitudes of measurement error and instrumental variable variance on our proposed estimator. The averaged squared bias (ABias<sup>2</sup>), averaged sample variance (Avar) and averaged integrated mean squared error (AIMSE) of  $\hat{\beta}_{IV}$  for sample size  $n = 500$ . The true function is  $\beta_1(t)$ .

| $\sigma_\omega = 1$ |                    |        |        | $\sigma_u = 1$  |                    |        |        |
|---------------------|--------------------|--------|--------|-----------------|--------------------|--------|--------|
| $\sigma_u$          | ABias <sup>2</sup> | Avar   | AIMSE  | $\sigma_\omega$ | ABias <sup>2</sup> | Avar   | AIMSE  |
| 0.5                 | 0.0001             | 0.0506 | 0.0507 | 0.50            | 0.0001             | 0.0488 | 0.0489 |
| 1                   | 0.0001             | 0.0504 | 0.0505 | 1.00            | 0.0001             | 0.0504 | 0.0505 |
| 4                   | 0.0001             | 0.0497 | 0.0498 | 4.00            | 0.0001             | 0.0794 | 0.0795 |
| 16                  | 0.0028             | 0.1070 | 0.1097 | 16.00           | 0.0003             | 0.4784 | 0.4787 |

### S.3 Case of Varying Correlation

Table S.8: The impact of correlation structures on the parameter estimates. The averaged squared bias ( $ABias^2$ ), averaged sample variance (Avar) and averaged integrated mean squared error (AIMSE) of  $\hat{\beta}_X$  for sample size  $n = 500$ . The true function is  $\beta_1(t)$

|                    |        | $\rho_X$ |        |        | $\rho_u$ |        |        | $\rho_\omega$ |        |        |
|--------------------|--------|----------|--------|--------|----------|--------|--------|---------------|--------|--------|
|                    | 0      | 0.25     | 0.5    | 0.75   | 0.25     | 0.5    | 0.75   | 0.25          | 0.5    | 0.75   |
| ABias <sup>2</sup> | 0.0001 | 0.0001   | 0.0002 | 0.0003 | 0.0001   | 0.0001 | 0.0001 | 0.0001        | 0.0001 | 0.0001 |
| Avar               | 0.0408 | 0.0437   | 0.0614 | 0.1125 | 0.0430   | 0.0446 | 0.0466 | 0.0408        | 0.0409 | 0.0411 |
| AIMSE              | 0.0408 | 0.0438   | 0.0615 | 0.1128 | 0.0431   | 0.0446 | 0.0466 | 0.0408        | 0.0410 | 0.0412 |

Table S.9: The impact of correlation structures on the parameter estimates. The averaged squared bias (ABias<sup>2</sup>), averaged sample variance (Avar) and averaged integrated mean squared error (AIMSE) of  $\hat{\beta}_W$  for sample size  $n = 500$ . The true function is  $\beta_1(t)$ .

|                    |        | $\rho_X$ |        |        | $\rho_u$ |        |        | $\rho_\omega$ |        |        |
|--------------------|--------|----------|--------|--------|----------|--------|--------|---------------|--------|--------|
|                    | 0      | 0.25     | 0.5    | 0.75   | 0.25     | 0.5    | 0.75   | 0.25          | 0.5    | 0.75   |
| ABias <sup>2</sup> | 0.0392 | 0.0454   | 0.0532 | 0.0633 | 0.0255   | 0.0133 | 0.0039 | 0.0392        | 0.0392 | 0.0392 |
| Avar               | 0.0246 | 0.0237   | 0.0259 | 0.0285 | 0.0246   | 0.0284 | 0.0337 | 0.0247        | 0.0247 | 0.0248 |
| AIMSE              | 0.0638 | 0.0691   | 0.0791 | 0.0918 | 0.0501   | 0.0417 | 0.0376 | 0.0639        | 0.0640 | 0.0641 |

Table S.10: The impact of correlation structures on the parameter estimates. The averaged squared bias (ABias<sup>2</sup>), averaged sample variance (Avar) and averaged integrated mean squared error (AIMSE) of  $\hat{\beta}_{WRS}$  for sample size  $n = 500$ . The true function is  $\beta_1(t)$ .

|                    |        | $\rho_X$ |        |        | $\rho_u$ |        |        | $\rho_\omega$ |        |        |
|--------------------|--------|----------|--------|--------|----------|--------|--------|---------------|--------|--------|
|                    | 0      | 0.25     | 0.5    | 0.75   | 0.25     | 0.5    | 0.75   | 0.25          | 0.5    | 0.75   |
| ABias <sup>2</sup> | 0.0392 | 0.0454   | 0.0532 | 0.0632 | 0.0255   | 0.0132 | 0.0039 | 0.0392        | 0.0392 | 0.0392 |
| Avar               | 0.0247 | 0.0238   | 0.0261 | 0.0289 | 0.0248   | 0.0287 | 0.0339 | 0.0248        | 0.0249 | 0.0249 |
| AIMSE              | 0.0638 | 0.0692   | 0.0793 | 0.0921 | 0.0502   | 0.0419 | 0.0378 | 0.0639        | 0.0640 | 0.0641 |

Table S.11: The impact of correlation structures on the parameter estimates. The averaged squared bias (ABias<sup>2</sup>), averaged sample variance (Avar) and averaged integrated mean squared error (AIMSE) of  $\widehat{\beta}_{WS}$  for sample size  $n = 500$ . The true function is  $\beta_1(t)$

|                    |        | $\rho_X$ |        |        | $\rho_u$ |        |        | $\rho_\omega$ |        |        |
|--------------------|--------|----------|--------|--------|----------|--------|--------|---------------|--------|--------|
|                    | 0      | 0.25     | 0.5    | 0.75   | 0.25     | 0.5    | 0.75   | 0.25          | 0.5    | 0.75   |
| ABias <sup>2</sup> | 0.0144 | 0.0188   | 0.0252 | 0.0355 | 0.0059   | 0.0008 | 0.0024 | 0.0144        | 0.0144 | 0.0144 |
| Avar               | 0.0867 | 0.0907   | 0.0973 | 0.1064 | 0.1106   | 0.1339 | 0.1687 | 0.0872        | 0.0880 | 0.0897 |
| AIMSE              | 0.1011 | 0.1095   | 0.1225 | 0.1419 | 0.1164   | 0.1347 | 0.1711 | 0.1015        | 0.1024 | 0.1041 |

Table S.12: The impact of correlation structures on the parameter estimates. The averaged squared bias (ABias<sup>2</sup>), averaged sample variance (Avar) and averaged integrated mean squared error (AIMSE) of  $\widehat{\beta}_{IV}$  for sample size  $n = 500$ . The true function is  $\beta_1(t)$ .

|                    |        | $\rho_X$ |        |        | $\rho_u$ |        |        | $\rho_\omega$ |        |        |
|--------------------|--------|----------|--------|--------|----------|--------|--------|---------------|--------|--------|
|                    | 0      | 0.25     | 0.5    | 0.75   | 0.25     | 0.5    | 0.75   | 0.25          | 0.5    | 0.75   |
| ABias <sup>2</sup> | 0.0001 | 0.0001   | 0.0002 | 0.0003 | 0.0001   | 0.0001 | 0.0001 | 0.0001        | 0.0001 | 0.0001 |
| Avar               | 0.0497 | 0.0540   | 0.0775 | 0.1521 | 0.0485   | 0.0483 | 0.0482 | 0.0552        | 0.0603 | 0.0652 |
| AIMSE              | 0.0498 | 0.0541   | 0.0776 | 0.1524 | 0.0486   | 0.0484 | 0.0483 | 0.0553        | 0.0604 | 0.0653 |
